# Supplementary material for: A midbrain to ventral striatum dopaminergic pathway orchestrates odor-guided feeding on cotton bollworm larvae in mice
Source: Research Square preprint supplement (doi:10.21203/rs.3.rs-6348387/v1), 2025-04-02
Supplement: Supplementary file 1 [file 71ed3c60a3a7225e958346ba.xlsx]

## Sheet: Figure 1 
	Figure 1. Both fasting and non-fasting mice prefer fed cotton bollworm larvae over unfed ones.
	D	Fed larvae	Unfed larvae		E	Fed larvae	Unfed larvae
	Number of larvae intake	1	0		Number of larvae intake	9	5
		0	0			10	7
		2	0			11	7
		0	0			8	6
		3	0			10	8
		0	1			8	7
		0	0			8	5
		2	0			9	6
		3	1			7	5
		2	2			9	6
		4	1			6	6
		2	0			7	3
	Number of values	12	12		Number of values	12	12
		Mann Whitney test				Unpaired t test
		P value	0.0325			P value	0.0001
		Exact or approximate P value?	Exact			P value summary	***
		P value summary	*			Significantly different (P < 0.05)?	Yes
		Significantly different (P < 0.05)?	Yes			One- or two-tailed P value?	Two-tailed
		One- or two-tailed P value?	Two-tailed			t, df	t=4.584, df=22
		Sum of ranks in column A,B	185.5 , 114.5
		Mann-Whitney U	36.5
	F	Fed larvae	Unfed larvae		G	Fed larvae	Unfed larvae
	Number of larvae intake	3	2		Number of larvae intake	5	3
		2	1			6	5
		1	0			8	6
		1	0			2	3
		1	0			6	6
		0	0			1	0
		1	0			9	6
		0	0			6	2
						Paired t test
		Wilcoxon matched-pairs signed rank test				P value	0.0331
		P value	0.0313			P value summary	*
		Exact or approximate P value?	Exact			Significantly different (P < 0.05)?	Yes
		P value summary	*			One- or two-tailed P value?	Two-tailed
		Significantly different (P < 0.05)?	Yes			t, df	t=2.646, df=7
		One- or two-tailed P value?	Two-tailed			Number of pairs	8
		Sum of positive, negative ranks	0.000 , -21.00
		Sum of signed ranks (W)	-21
		Number of pairs	8
		Number of ties (ignored)	2
	H				I	Fed larvae	Unfed larvae
					Time around the cup (s)	876.844	0
		Fed larvae	Unfed larvae			536.87	0
	Time around the cup (s)	48.682	57.324			741.375	84.7514
		106.44	133.4			235.469	230.998
		136.203	126.76			154.354	102.97
		168.468	97.7978			138.505	46.313
		133.433	81.1478			333.567	211.845
		129.63	74.6413			372.806	145.546
		259.66	244.344
		306.139	194.912
		284.373	197.787			Paired t test
		242.609	189.957			P value	0.027
		233.36	225.646			P value summary	*
		191.558	100.234			Significantly different (P < 0.05)?	Yes
		221.054	132.432			One- or two-tailed P value?	Two-tailed
		181.497	130.942			t, df	t=2.788, df=7
		244.978	173.207			Number of pairs	8
		233.167	114.181
		156.99	75.6089
		173.674	86.5532
		Paired t test
		P value	<0.0001
		P value summary	****
		Significantly different (P < 0.05)?	Yes
		One- or two-tailed P value?	Two-tailed
		t, df	t=5.733, df=17
		Number of pairs	18
	J	Fed larvae	Unfed larvae		K	Fed larvae	Unfed larvae
	Distance travelled around the cup (cm)	649.916	656.594		Distance travelled around the cup (cm)	579.312	0
		1151.93	538.686			279.666	0
		663.884	743.865			486.274	128.517
		280.51	425.182			484.084	432.87
		447.149	518.426			348.251	296.285
		485.499	304.621			226.179	165.093
		813.483	633.316			386.617	342.688
		155.979	156.446			469.562	300.176
		453.973	595.402
		558.429	538.939
		793.504	390.021			Paired t test
		419.015	335.458			P value	0.0229
		511.179	282.646			P value summary	*
		626.853	457.793			Significantly different (P < 0.05)?	Yes
		807.628	870.768			One- or two-tailed P value?	Two-tailed
		1198.08	684.905			t, df	t=2.904, df=7
		727.855	391.861			Number of pairs	8
		860.263	479.329
		Paired t test
		P value	0.0161
		P value summary	*
		Significantly different (P < 0.05)?	Yes
		One- or two-tailed P value?	Two-tailed
		t, df	t=2.673, df=17
		Number of pairs	18

## Sheet: Figure2
	Figure 2. The main olfactory system is essential for the preference for fed cotton bollworm larvae in both non-fasting and fasting mice.
	D	Fed larvae	Unfed larvae		E	Fed larvae	Unfed larvae		F	Fed larvae	Unfed larvae		G	Fed larvae	Unfed larvae
	Time around the cup (s)	177.177	177.044		Distance travelled around the cup (cm)	701.221	733.854		Time around the cup (s)	407.708	164.331		Distance travelled around the cup (cm)	1184.27	724.465
		174.708	95.6623			644.585	436.467			286.587	218.886			784.199	699.424
		187.821	169.536			567.293	562.963			414.147	179.813			682.776	519.45
		209.243	154.988			832.677	612.066			479.446	172.072			681.199	503.948
		278.478	170.637			1016.11	653.265			241.708	277.477			839.922	861.794
		225.792	196.663			770.601	775.499			375.542	252.853			986.347	816.767
		139.306	144.778			564.897	487.829			348.582	112.212			549.133	414.731
		275.142	208.208			783.799	587.997			554.955	121.555			663.237	448.966
		Paired t test				Paired t test				Paired t test				Paired t test
		P value	0.0174			P value	0.0347			P value	0.0059			P value	0.0091
		P value summary	*			P value summary	*			P value summary	**		.	P value summary	**
		Significantly different (P < 0.05)?	Yes			Significantly different (P < 0.05)?	Yes			Significantly different (P < 0.05)?	Yes			Significantly different (P < 0.05)?	Yes
		One- or two-tailed P value?	Two-tailed			One- or two-tailed P value?	Two-tailed			One- or two-tailed P value?	Two-tailed			One- or two-tailed P value?	Two-tailed
		t, df	t=3.096, df=7			t, df	t=2.615, df=7			t, df	t=3.894, df=7			t, df	t=3.566, df=7
		Number of pairs	8			Number of pairs	8			Number of pairs	8			Number of pairs	8
	H	Fed larvae	Unfed larvae		I	Fed larvae	Unfed larvae		J	Fed larvae	Unfed larvae		K
	Time around the cup (s)	239.806	204.705		Distance travelled around the cup (cm)	1130.46	822.636		Time around the cup (s)	224.091	234.701			Fed larvae	Unfed larvae
		217.05	248.782			901.263	752.512			180.948	291.158		Distance travelled around the cup (cm)	1336.22	1112.62
		369.436	221.488			1102.37	982.374			256.99	162.663			796.415	882.087
		147.181	340.14			704.016	910.244			179.446	447.481			1129.54	713.861
		207.074	340.841			779.746	854.273			472.105	153.754			862.28	956.068
		174.908	267.701			1188.07	607.61			402.936	260.694			749.211	805.972
		371.271	104.872			1017.94	340.52			205.572	297.998			1040.35	770.232
		700.701	58.7921			1002.37	264.682			279.746	384.051			1147.36	1267.64
														587.823	563.294
		Wilcoxon matched-pairs signed rank test				Paired t test				Paired t test
		P value	0.6406			P value	0.0544			P value	0.9544			Paired t test
		Exact or approximate P value?	Exact			P value summary	ns			P value summary	ns			P value	0.3481
		P value summary	ns			Significantly different (P < 0.05)?	No			Significantly different (P < 0.05)?	No			P value summary	ns
		Significantly different (P < 0.05)?	No			One- or two-tailed P value?	Two-tailed			One- or two-tailed P value?	Two-tailed			Significantly different (P < 0.05)?	No
		One- or two-tailed P value?	Two-tailed			t, df	t=2.307, df=7			t, df	t=0.05931, df=7			One- or two-tailed P value?	Two-tailed
		Sum of positive, negative ranks	14.00 , -22.00			Number of pairs	8			Number of pairs	8			t, df	t=1.006, df=7
		Sum of signed ranks (W)	-8											Number of pairs	8
		Number of pairs	8

## Sheet: Figure 3
			Figure 3. A comparison of body compounds reveals quantity differences between fed and unfed cotton bollworm.
	A	Fed larvae	Unfed larvae		B	Fed larvae	Unfed larvae		C	Fed larvae	Unfed larvae
	Relative contents of linoleic acid (%)	0.7543	0.3746		Relative contents of (Z)-9-tricosene (%)	1.0475	1.0276		Relative contents of 3,5-Di-tert-butylphenol (%)	1.0155	0.2178
		1.1761	0.2302			1.29354	0.998322			0.6772	0.2032
		1.0249	0.6878			0.648693	1.67936			0.593	0.2207
		1.19472	0.736289			0.3856	1.2633			0.8034	0.1972
		1.19535	0.763663			0.8153	1.0137			0.2536	0.3582
		1.1401	1.1536			0.5843	1.6259			0.9043	0.2607
	Number of values	6	6		Number of values	6	6		Number of values	6	6
		Mann Whitney test				Unpaired t test				Mann Whitney test
		P value	0.026			P value	0.0295			P value	0.0087
		Exact or approximate P value?	Exact			P value summary	*			Exact or approximate P value?	Exact
		P value summary	*			Significantly different (P < 0.05)?	Yes			P value summary	**
		Significantly different (P < 0.05)?	Yes			One- or two-tailed P value?	Two-tailed			Significantly different (P < 0.05)?	Yes
		One- or two-tailed P value?	Two-tailed			t, df	t=2.538, df=10			One- or two-tailed P value?	Two-tailed
		Sum of ranks in column A,B	53 , 25							Sum of ranks in column A,B	55 , 23
		Mann-Whitney U	4							Mann-Whitney U	2
	D	Fed larvae	Unfed larvae		E	Fed larvae	Unfed larvae		F	Fed larvae	Unfed larvae
	Relative contents of heptacosene (%)	1.27416	1.1692		Relative contents of pentacosane (%)	2.911	1.9864		Relative contents of 3-ethyl-5-(2-ethylbutyl) octadecane (%)	1.15177	0.701528
		0.94717	1.1455			2.5461	2.0322			0.916674	0.539309
		0.884448	1.1649			2.3607	2.2746			0.72145	0.480728
		0.972562	1.0948			2.8069	2.3064			1.59303	1.17596
		0.643451	2.1119			1.9963	1.5723			1.21768	0.728735
		1.0876	1.2797			2.4806	2.0059			1.0245	0.861866
	Number of values	6	6		Number of values	6	6		Number of values	6	6
		Mann Whitney test				Unpaired t test				Unpaired t test
		P value	0.026			P value	0.0176			P value	0.0487
		Exact or approximate P value?	Exact			P value summary	*			P value summary	*
		P value summary	*			Significantly different (P < 0.05)?	Yes			Significantly different (P < 0.05)?	Yes
		Significantly different (P < 0.05)?	Yes			One- or two-tailed P value?	Two-tailed			One- or two-tailed P value?	Two-tailed
		One- or two-tailed P value?	Two-tailed			t, df	t=2.837, df=10			t, df	t=2.244, df=10
		Sum of ranks in column A,B	25 , 53
		Mann-Whitney U	4

## Sheet: Figure 4
			Figure 4. Mice exhibit a preference for LA while displaying avoidance of (Z)-9-TE.
	D	Mineral oil	Linoleic acid		E	Mineral oil	Linoleic acid		F	Mineral oil	Linoleic acid		G	Mineral oil	Linoleic acid
	Time around the cup (s)	103.27	494.995		Distance travelled around the cup (cm)	252.139	793.906		Time around the cup (s)	277.311	317.518		Distance travelled around the cup (cm)	865.868	910.825
		155.389	238.105			454.632	565.016			280.781	254.922			826.503	701.79
		164.231	257.624			542.455	842.453			217.985	271.538			745.686	732.495
		221.955	181.415			648.851	516.588			143.544	180.814			463.878	557.31
		221.989	257.457			422.993	547.699			221.221	345.012			776.734	799.657
		100.033	385.953			397.068	618.579			272.439	288.689			563.161	635.173
		260.16	297.497			471.332	559.318			184.017	255.622			385.403	313.66
		130.297	389.022			325.929	721.152			187.688	260.227			575.829	519.471
		Paired t test				Paired t test				Paired t test				Paired t test
		P value	0.031			P value	0.0262			P value	0.0167			P value	0.8834
		P value summary	*			P value summary	*			P value summary	*			P value summary	ns
		Significantly different (P < 0.05)?	Yes			Significantly different (P < 0.05)?	Yes			Significantly different (P < 0.05)?	Yes			Significantly different (P < 0.05)?	No
		One- or two-tailed P value?	Two-tailed			One- or two-tailed P value?	Two-tailed			One- or two-tailed P value?	Two-tailed			One- or two-tailed P value?	Two-tailed
		t, df	t=2.692, df=7			t, df	t=2.809, df=7			t, df	t=3.127, df=7			t, df	t=0.1521, df=7
		Number of pairs	8			Number of pairs	8			Number of pairs	8			Number of pairs	8
	H	Mineral oil	(Z) - 9 - Tricosene		I	Mineral oil	(Z) - 9 - Tricosene		J	Mineral oil	(Z) - 9 - Tricosene		K	Mineral oil	(Z) - 9 - Tricosene
	Time around the cup (s)	222.122	218.785		Distance travelled around the cup (cm)	744.229	804.007		Time around the cup (s)	351.785	175.909		Distance travelled around the cup (cm)	1424.47	719.098
		246.68	92.626			610.306	309.552			281.148	219.286			1014.84	601.267
		364.798	221.822			760.089	601.721			457.391	190.724			1226.48	474.339
		325.792	246.246			569.853	924.83			368.602	171.772			1086.52	612.285
		236.436	255.155			692.954	786.209			347.681	264.298			826.089	565.279
		143.944	111.945			443.54	597.402			201.235	188.222			853.807	799.346
		223.857	157.391			449.781	371.492			204.338	169.369			658.703	556.617
		422.89	161.028			485.399	368.762			218.919	183.217			677.866	821.411
		Paired t test				Paired t test				Wilcoxon matched-pairs signed rank test				Paired t test
		P value	0.0281			P value	0.9897			P value	0.0078			P value	0.0223
		P value summary	*			P value summary	ns			Exact or approximate P value?	Exact			P value summary	*
		Significantly different (P < 0.05)?	Yes			Significantly different (P < 0.05)?	No			P value summary	**			Significantly different (P < 0.05)?	Yes
		One- or two-tailed P value?	Two-tailed			One- or two-tailed P value?	Two-tailed			Significantly different (P < 0.05)?	Yes			One- or two-tailed P value?	Two-tailed
		t, df	t=2.760, df=7			t, df	t=0.01342, df=7			One- or two-tailed P value?	Two-tailed			t, df	t=2.920, df=7
		Number of pairs	8			Number of pairs	8			Sum of positive, negative ranks	0.000 , -36.00			Number of pairs	8
										Sum of signed ranks (W)	-36
										Number of pairs	8
										Number of ties (ignored)	0
	L	Linoleic acid	(Z)-9-Tricosene		M	Linoleic acid	(Z)-9-Tricosene		N	Linoleic acid	(Z)-9-Tricosene		O	Linoleic acid	(Z)-9-Tricosene
	Time around the cup (s)	186	169.566		Distance travelled around the cup (cm)	1165.31	1047.84		Time around the cup (s)	292.526	282.249		Distance travelled around the cup (cm)	1108.19	749.46
		343.2	206.766			1770.46	1429.72			256.256	239.706			901.241	740.864
		271.733	215.5			1561.96	1585.71			261.528	219.953			1278.49	1105.71
		245.333	243.4			1608.48	1183.37			391.058	140.174			1563.34	435.87
		290.7	221.133			2520.89	1074.62			189.456	134.067			663.691	435.544
		106.3	100.8			793.761	842.916			257.424	155.889			744.293	506.744
		331.566	185.866			3249.65	1654.52			164.498	150.951			627.257	449.571
		238.833	153.2			2367.46	1759.3			330.364	250.717			794.656	559.804
						Paired t test				Paired t test				Wilcoxon matched-pairs signed rank test
		Paired t test				P value	0.0423			P value	0.0394			P value	0.0078
		P value	0.0138			P value summary	*			P value summary	*			Exact or approximate P value?	Exact
		P value summary	*			Significantly different (P < 0.05)?	Yes			Significantly different (P < 0.05)?	Yes			P value summary	**
		Significantly different (P < 0.05)?	Yes			One- or two-tailed P value?	Two-tailed			One- or two-tailed P value?	Two-tailed			Significantly different (P < 0.05)?	Yes
		One- or two-tailed P value?	Two-tailed			t, df	t=2.479, df=7			t, df	t=2.527, df=7			One- or two-tailed P value?	Two-tailed
		t, df	t=3.262, df=7			Number of pairs	8			Number of pairs	8			Sum of positive, negative ranks	0.000 , -36.00
		Number of pairs	8											Sum of signed ranks (W)	-36
														Number of pairs	8
														Number of ties (ignored)	0

## Sheet: Figure 5
			Figure 5. Chemogenetic manipulation of the VTA-mOT dopaminergic pathway alters the preference for LA over (Z)-9-TE in non-fasting mice.
	C	Linoleic acid	(Z)- 9 - Tricosene		D	Linoleic acid	(Z)- 9 - Tricosene		E	Linoleic acid	(Z)- 9 - Tricosene		F	Linoleic acid	(Z)- 9 - Tricosene
	Time around the cup (s)	341.808	295.929		Distance travelled around the cup (cm)	1564.94	1311.2		Time around the cup (s)	178.879	333.166		Distance travelled around the cup (cm)	792.535	1200.69
		244.044	229.396			1063.32	821.98			194.394	236.904			625.987	624.743
		329.796	184.985			1290.83	656.135			108.175	195.796			503.569	622.991
		245.679	216.55			1215.36	908.673			242.676	251.552			544.994	448.455
		273.273	222.155			1106.26	802.809			339.54	292.759			562.227	561.188
		225.492	224.057			755.193	597.203			216.25	402.903			574.545	730.468
		258.759	250.35			1093.53	838.937			393.093	275.108			1293.76	917.906
		290.991	240.407			839.448	688.474			173.607	310.043			534.267	686.579
		Paired t test				Paired t test				Paired t test				Paired t test
		P value	0.0308			P value	0.001			P value	0.1728			P value	0.5923
		P value summary	*			P value summary	**			P value summary	ns			P value summary	ns
		Significantly different (P < 0.05)?	Yes			Significantly different (P < 0.05)?	Yes			Significantly different (P < 0.05)?	No			Significantly different (P < 0.05)?	No
		One- or two-tailed P value?	Two-tailed			One- or two-tailed P value?	Two-tailed			One- or two-tailed P value?	Two-tailed			One- or two-tailed P value?	Two-tailed
		t, df	t=2.696, df=7			t, df	t=5.371, df=7			t, df	t=1.518, df=7			t, df	t=0.5610, df=7
		Number of pairs	8			Number of pairs	8			Number of pairs	8			Number of pairs	8
	I	Linoleic acid	(Z)- 9 - Tricosene		J	Linoleic acid	(Z)- 9 - Tricosene		K	Linoleic acid	(Z)- 9 - Tricosene		L	Linoleic acid	(Z)- 9 - Tricosene
	Time around the cup (s)	502.369	146.146		Distance travelled around the cup (cm)	569.593	348.826		Time around the cup (s)	249.616	450.651		Distance travelled around the cup (cm)	792.814	1369.41
		372.172	140.374			940.388	531.869			174.174	454.621			552.415	847.798
		333.4	330.497			868.899	693.265			235.802	376.743			410.855	688.824
		343.143	325.259			843.523	661.34			333.267	356.19			395.648	534.897
		568.502	108.542			827.109	346.336			326.026	479.213			373.012	569.526
		520.754	346.446			430.011	386.326			164.164	420.153			501.184	746.994
		544.077	126.527			887.106	319.873			252.286	413.68			559.274	478.874
		464.031	162.129			1070.11	421.917			215.816	288.589			426.863	607.541
		Wilcoxon matched-pairs signed rank test				Paired t test				Paired t test				Wilcoxon matched-pairs signed rank test
		P value	0.0078			P value	0.0029			P value	0.0012			P value	0.0156
		Exact or approximate P value?	Exact			P value summary	**			P value summary	**			Exact or approximate P value?	Exact
		P value summary	**			Significantly different (P < 0.05)?	Yes			Significantly different (P < 0.05)?	Yes			P value summary	*
		Significantly different (P < 0.05)?	Yes			One- or two-tailed P value?	Two-tailed			One- or two-tailed P value?	Two-tailed			Significantly different (P < 0.05)?	Yes
		One- or two-tailed P value?	Two-tailed			t, df	t=4.474, df=7			t, df	t=5.276, df=7			One- or two-tailed P value?	Two-tailed
		Sum of positive, negative ranks	0.000 , -36.00			Number of pairs	8			Number of pairs	8			Sum of positive, negative ranks	35.00 , -1.000
		Sum of signed ranks (W)	-36											Sum of signed ranks (W)	34
		Number of pairs	8											Number of pairs	8
		Number of ties (ignored)	0											Number of ties (ignored)	0

## Sheet: Figure 6
			Figure 6. Antagonism of dopamine D1 and D2 receptors in the mOT modulates responsiveness to LA and (Z)-9-TE in a two-choice odor preference test.
	E	Saline	SCH23390	Eticlopride		F	Saline	SCH23390	Eticlopride		G	Saline	SCH23390	Eticlopride		H	Saline	SCH23390	Eticlopride
	Odor preference index (time)	0.156454	-0.62584	0.51552		Odor preference index (distance)	0.257913	0.214897	0.294659		Odor preference index (time)	0.435409	0.123576	-0.0017		Odor preference index (distance)	0.302132	0.146172	0.396925
		0.127198	0.297348	-0.02456			0.174513	0.194437	-0.06785			0.222718	-0.51685	-0.03517			0.22788	-0.35947	0.040369
		0.597261	-0.18401	0.224107			0.417957	-0.42342	0.114727			0.135016	0.054875	-0.0834			0.083562	0.055476	0.127941
		0.723037	0.571612	0.252303			0.606758	-0.08433	0.211572			0.302322	0.284824	-0.0726			0.023742	0.051242	0.019817
		0.420117	-0.06341	0.572871			0.363164	-0.06002	0.397908			0.054458	-0.2576	0.093777			0.037907	-0.17325	0.194812
		0.356916	-0.58232	0.033639			0.277806	-0.45157	0.155386			0.172513	0.121221	0.320327			0.052716	0.181182	0.270391
		0.163725	-0.13561	0.155762			0.047015	0.06673	0.130751			0.198793	-0.08959	-0.51495			0.154784	0.0305	-0.62493
		0.139308	0.334163	-0.27045			0.149628	0.131231	-0.11594			0.515787	-0.72296	-0.48769			0.376703	-0.64153	-0.39802
		0.560245	0.045443	0.213131			0.471269	0.026016	0.12149			0.495199	0.364738	0.017847			0.438035	0.225923	0.09122
		0.360078	0.32269	0.285088			0.253477	0.182949	0.178254			0.546527	0.121221	0.066255			0.444904	-0.54554	0.247936
		0.185219	-0.25698	-0.09525			0.150817	-0.22088	-0.09035			0.388872	0.353727	0.939484			0.346751	0.356243	0.784953
	Number of values	11	11	11		Number of values	11	11	11		Number of values	11	11	11		Number of values	11	11	11
	RM one-way ANOVA					RM one-way ANOVA					RM one-way ANOVA
		F (DFn, DFd)	P value					F (DFn, DFd)	P value			F (DFn, DFd)	P value			RM one-way ANOVA	F (DFn, DFd)	P value
	Treatment (between columns)	F (1.352, 13.52) = 4.801	P=0.0376			Treatment (between columns)		F (1.418, 14.18) = 8.050	P=0.0080		Treatment (between columns)	F (1.900, 19.00) = 4.888	P=0.0207				F (1.987, 19.87) = 3.050	P=0.0703
	Individual (between rows)	F (10, 20) = 1.253	P=0.3187			Individual (between rows)		F (10, 20) = 0.9910	P=0.4820		Individual (between rows)	F (10, 20) = 2.140	P=0.0708			Treatment (between columns)	F (10, 20) = 1.642	P=0.1657
																Individual (between rows)
	Tukey's multiple comparisons test	Summary	Adjusted P Value			Tukey's multiple comparisons test		Summary	Adjusted P Value		Tukey's multiple comparisons test	Summary	Adjusted P Value
	Saline vs. SCH23390	*	0.0239			Saline vs. SCH23390		*	0.0194		Saline vs. SCH23390	*	0.0351			Tukey's multiple comparisons test	Summary	Adjusted P Value
	SCH23390 vs. Eticlopride	ns	0.1129			SCH23390 vs. Eticlopride		*	0.0196		SCH23390 vs. Eticlopride	ns	0.1034			Saline vs. SCH23390	ns	0.0894
	Saline vs. Eticlopride	ns	0.4384			Saline vs. Eticlopride		ns	0.2115		Saline vs. Eticlopride	ns	0.9365			SCH23390 vs. Eticlopride	ns	0.5722
																Saline vs. Eticlopride	ns	0.3425
	I	Saline	SCH23390	Eticlopride		J	Saline	SCH23390	Eticlopride		K	Saline	SCH23390	Eticlopride		L	Saline	SCH23390	Eticlopride
	Odor preference index (time)	-0.44432	0.457612	0.028095		Odor preference index (distance)	-0.30874	0.133616	0.078855		Odor preference index (time)	-0.34328	0.052705	0.05762		Odor preference index (distance)	-0.27388	0.159487	-0.03938
		-0.31042	0.003383	0.385776			-0.11268	-0.11015	0.233794			-0.40166	0.096666	-0.17827			-0.24551	0.079828	-0.08718
		-0.59239	-0.01333	0.353071			-0.29769	-0.00205	0.242911			-0.00431	0.296293	0.145592			-0.15733	0.16911	-0.00365
		-0.25029	-0.66415	0.078713			-0.25748	-0.53252	0.033462			-0.24613	-0.09713	0.186414			-0.27431	-0.0685	0.068522
		-0.35491	-0.02045	0.557491			-0.38439	0.032231	0.500769			-0.52205	-0.08053	0.122575			-0.29009	-0.21408	0.184928
		-0.26152	-0.14022	0.679367			-0.20854	-0.09752	0.497165			-0.09234	-0.11855	0.215512			-0.10306	0.324241	0.193973
		-0.37603	0.161229	0.692082			-0.26692	0.093101	0.295589			-0.27471	-0.83387	0.225113			-0.272	-0.64084	0.264976
		-0.47837	-0.40134	0.258943			-0.34406	-0.31542	0.179432			-0.554	-0.67494	0.197774			-0.38368	-0.44301	0.250358
		-0.57045	-0.67374	0.509295			-0.43199	-0.59309	0.329045			-0.02327	0.209942	-0.17361			-0.06875	-0.22886	-0.11682
		-0.62263	-0.5981	0.287367			-0.46936	-0.44625	0.163151			-0.25115	-0.43299	0.711339			-0.27027	-0.33739	0.410597
		-0.82686	-0.20039	0.414493			-0.67491	-0.12668	0.337423			-0.1514	-0.1828	-0.36488			-0.20672	-0.11233	-0.14538
	Number of values	11	11	11		Number of values	11	11	11		Number of values	11	11	11		Number of values	11	11	11
	RM one-way ANOVA															RM one-way ANOVA
		F (DFn, DFd)	P value			RM one-way ANOVA					RM one-way ANOVA						F (DFn, DFd)	P value
	Treatment (between columns)	F (1.677, 16.77) = 32.51	P<0.0001				F (DFn, DFd)	P value				F (DFn, DFd)	P value			Treatment (between columns)	F (1.299, 12.99) = 5.974	P=0.0232
	Individual (between rows)	F (10, 20) = 1.312	P=0.2895			Treatment (between columns)	F (1.926, 19.26) = 34.53	P<0.0001			Treatment (between columns)	F (1.358, 13.58) = 4.475	P=0.0439			Individual (between rows)	F (10, 20) = 0.5901	P=0.8034
						Individual (between rows)	F (10, 20) = 1.527	P=0.2015			Individual (between rows)	F (10, 20) = 0.7508	P=0.6715
	Tukey's multiple comparisons test	Summary	Adjusted P Value													Tukey's multiple comparisons test	Summary	Adjusted P Value
	Saline vs. SCH23390	ns	0.0878			Tukey's multiple comparisons test	Summary	Adjusted P Value			Tukey's multiple comparisons test	Summary	Adjusted P Value			Saline vs. SCH23390	ns	0.3608
	SCH23390 vs. Eticlopride	****	<0.0001			Saline vs. SCH23390	ns	0.1559			Saline vs. SCH23390	ns	0.5712			SCH23390 vs. Eticlopride	**	0.0031
	Saline vs. Eticlopride	**	0.0022			SCH23390 vs. Eticlopride	****	<0.0001			SCH23390 vs. Eticlopride	*	0.0175			Saline vs. Eticlopride	ns	0.2586
						Saline vs. Eticlopride	***	0.0005			Saline vs. Eticlopride	ns	0.2822
	M	Saline	SCH23390	Eticlopride		N	Saline	SCH23390	Eticlopride		O	Saline	SCH23390	Eticlopride		P	Saline	SCH23390	Eticlopride
	Odor preference index (time)	0.201415	-0.66429	0.255277		Odor preference index (distance)	0.256158	-0.35938	0.252477		Odor preference index (time)	0.484613	-0.15203	-0.57176		Odor preference index (distance)	0.261012	-0.10918	-0.30911
		0.332492	0.333256	0.601979			0.118868	0.203531	0.505827			0.475187	0.453804	-0.30567			0.402034	-0.13074	-0.25041
		0.231444	0.222835	0.030616			0.090564	-0.01775	0.169465			0.386925	-0.30584	0.070177			0.273318	-0.04566	0.125664
		0.096521	-0.05896	0.180723			0.070694	0.105437	0.158766			0.129777	0.809593	0.188406			0.123121	0.588758	0.066379
		0.232189	-0.32535	-0.3458			0.272952	-0.19759	-0.19493			0.33782	0.167736	-0.45578			0.332402	0.106824	-0.16807
		0.369222	0.185493	0.257357			0.394423	0.080824	0.395719			0.378593	-0.70536	0.285755			0.391276	-0.37351	0.116185
		0.072571	-0.17476	0.148466			0.166661	0.026411	0.117706			0.062785	0.220244	-0.0108			0.225901	0.168258	0.088285
		0.398036	0.024952	0.261428			0.359256	0.1756	0.200586			0.032909	-0.07563	0.292389			0.172191	-0.06054	0.338703
		0.245807	-0.16871	0.024298			0.368115	-0.06599	-0.07169			0.24206	-0.34438	-0.01065			0.328377	-0.2454	0.12164
		0.058972	-0.09579	0.308217			0.171283	0.008468	0.322979			0.013327	-0.14886	0.038742			0.003353	-0.07282	0.26822
		0.060296	0.068458	0.215165			0.173355	0.121757	0.082976			0.269202	0.047596	-0.45655			0.309213	0.122293	-0.22197
		-0.15701	-0.20969	0.409557			0.001642	-0.18159	0.141882			0.408434	-0.13248	-0.06403			0.467851	-0.02587	0.108111
	Number of values	12	12	12		Number of values	12	12	12		Number of values	12	12	12		Number of values	12	12	12
	RM one-way ANOVA					RM one-way ANOVA					RM one-way ANOVA					RM one-way ANOVA
		F (DFn, DFd)	P value				F (DFn, DFd)	P value				F (DFn, DFd)	P value				F (DFn, DFd)	P value
	Treatment (between columns)	F (1.967, 21.63) = 6.735	P=0.0055			Treatment (between columns)	F (1.875, 20.63) = 6.732	P=0.0063			Treatment (between columns)	F (1.822, 20.04) = 3.714	P=0.0460			Treatment (between columns)	F (1.951, 21.46) = 5.811	P=0.0100
	Individual (between rows)	F (11, 22) = 1.793	P=0.1174			Individual (between rows)	F (11, 22) = 1.431	P=0.2277			Individual (between rows)	F (11, 22) = 0.4365	P=0.9221			Individual (between rows)	F (11, 22) = 0.4278	P=0.9269
	Tukey's multiple comparisons test	Summary	Adjusted P Value			Tukey's multiple comparisons test	Summary	Adjusted P Value			Tukey's multiple comparisons test	Summary	Adjusted P Value			Tukey's multiple comparisons test	Summary	Adjusted P Value
	Saline vs. SCH23390	*	0.0182			Saline vs. SCH23390	*	0.0126			Saline vs. SCH23390	ns	0.1313			Saline vs. SCH23390	*	0.0265
	SCH23390 vs. Eticlopride	ns	0.9778			SCH23390 vs. Eticlopride	ns	0.903			SCH23390 vs. Eticlopride	*	0.0323			SCH23390 vs. Eticlopride	*	0.0299
	Saline vs. Eticlopride	*	0.0214			Saline vs. Eticlopride	*	0.0204			Saline vs. Eticlopride	ns	0.8966			Saline vs. Eticlopride	ns	0.9474

## Sheet: Figure 7
				Figure 7. GCaMP6s-expressing D1 and D2 SPNs in the mOT respond to LA and (Z)-9-TE during the two-choice odor preference test.
	B	Mineral oil	Linoleic acid			Mineral oil	Linoleic acid		C	Mineral oil	(Z)- 9 - Tricosene			Mineral oil	(Z)- 9 - Tricosene		D	Linoleic acid	(Z)- 9 - Tricosene			Linoleic acid	(Z)- 9 - Tricosene
	AUC	144.208	452.908		△ F/F (%)	0.348	0.892		AUC	47.925	113.158		△ F/F (%)	0.231	0.246		AUC	84.6583	1.0667		△ F/F (%)	0.209	0.137
		217.917	513.417			0.261	1.144			34.65	-35.3083			0.137	0.04			85.4583	-43.7667			0.281	0.089
		23.9917	68.3667			0.07	0.156			112.342	309.4			0.315	0.572			121.067	22.8167			0.202	0.112
		-3.35	187.842			0.086	0.262			43.8167	-3.5667			0.112	0.07			414.35	-13.8			0.66	0.198
		-27.667	69.4833			0.137	0.246			84.092	39.6167			0.145	0.111			431.167	-25.075			1	0.241
		8.25	99.9417			0.048	0.141			185.758	4.675			0.292	0.186			243.458	52.4666			0.777	0.295
		-59.725	664.017			0.173	1.26			29.6583	49.6333			0.12	0.136			594.3	-46.5083			1.138	0.197
		54.575	408.308			0.351	0.638			108.625	-15.8083			0.337	0.333			189.992	101.842			0.932	0.31
		Paired t test				Paired t test				Wilcoxon matched-pairs signed rank test				Paired t test				Paired t test				Paired t test
		P value	0.0113			P value	0.0212			P value	0.5469			P value	0.988			P value	0.01			P value	0.005
		P value summary	*			P value summary	*			Exact or approximate P value?	Exact			P value summary	ns			P value summary	*			P value summary	**
		Significantly different (P < 0.05)?	Yes			Significantly different (P < 0.05)?	Yes			P value summary	ns			Significantly different (P < 0.05)?	No			Significantly different (P < 0.05)?	Yes			Significantly different (P < 0.05)?	Yes
		One- or two-tailed P value?	Two-tailed			One- or two-tailed P value?	Two-tailed			Significantly different (P < 0.05)?	No			One- or two-tailed P value?	Two-tailed			One- or two-tailed P value?	Two-tailed			One- or two-tailed P value?	Two-tailed
		t, df	t=3.412, df=7			t, df	t=2.958, df=7			One- or two-tailed P value?	Two-tailed			t, df	t=0.01558, df=7			t, df	t=3.496, df=7			t, df	t=4.029, df=7
		Number of pairs	8			Number of pairs	8			Sum of positive, negative ranks	13.00 , -23.00			Number of pairs	8			Number of pairs	8			Number of pairs	8
										Sum of signed ranks (W)	-10
										Number of pairs	8
										Number of ties (ignored)	0
	E	Mineral oil	Linoleic acid			Mineral oil	Linoleic acid		F	Mineral oil	(Z)-9--tricosene			Mineral oil	(Z)-9--tricosene		G	Linoleic acid	(Z)- 9 - Tricosene			Linoleic acid	(Z)- 9 - Tricosene
	AUC	-742.975	779.833		△ F/F (%)	0.249	0.568		AUC	226.525	177.9		△ F/F (%)	1.363	2.101		AUC	573.842	1466.76		△ F/F (%)	1.882	3.191
		338.4	2051.32			3.354	6.287			515.783	1225.7			1.843	2.747			852.775	936.658			1.279	2.331
		60.625	60.625			1.95	3.749			-312.1	482.717			0.302	1.44			1205	3112.22			4.303	5.686
		1664	2460.72			2.652	2.142			901.108	2256.65			2.395	2.671			378.175	3801.8			2.574	6.116
		-36.0833	779.175			-0.187	1.403			-380.092	952			-0.032	1.95			570.25	2178.93			0.941	3.121
		-0.175	400.933			2.757	3.091			-362.175	756.583			0.056	1.109			118.633	3871.92			0.832	6.088
		1794.56	1656.6			0.42	1.211			37.85	1847.18			0.3	2.564
		1853.12	4822.04			0.32	1.248			424.892	1379.63			2.505	3.076
		Paired t test				Paired t test				Paired t test				Paired t test				Paired t test				Paired t test
		P value	0.0273			P value	0.03			P value	0.0013			P value	0.0024			P value	0.0204			P value	0.0147
		P value summary	*			P value summary	*			P value summary	**			P value summary	**			P value summary	*			P value summary	*
		Significantly different (P < 0.05)?	Yes			Significantly different (P < 0.05)?	Yes			Significantly different (P < 0.05)?	Yes			Significantly different (P < 0.05)?	Yes			Significantly different (P < 0.05)?	Yes			Significantly different (P < 0.05)?	Yes
		One- or two-tailed P value?	Two-tailed			One- or two-tailed P value?	Two-tailed			One- or two-tailed P value?	Two-tailed			One- or two-tailed P value?	Two-tailed			One- or two-tailed P value?	Two-tailed			One- or two-tailed P value?	Two-tailed
		t, df	t=2.781, df=7			t, df	t=2.714, df=7			t, df	t=5.140, df=7			t, df	t=4.622, df=7			t, df	t=3.345, df=5			t, df	t=3.653, df=5
		Number of pairs	8			Number of pairs	8			Number of pairs	8			Number of pairs	8			Number of pairs	6			Number of pairs	6

## Sheet: Supplementary Figure 1
			Supplementary Figure 1. Visual cues from cotton bollworm larvae are not essential for the preference observed in both non-fasting and fasting mice. Related to Figure 1.
	C	Fed larvae	Unfed larvae		D	Fed larvae	Unfed larvae		E	Fed larvae	Unfed larvae		F	Fed larvae	Unfed larvae
	Time around the cup (s)	108.876	46.2462		Time in the chamber (s)	460.528	438.138		Distance travelled around the cup (cm)	401.664	172.471		Distance travelled in the chamber (cm)	1639.19	1111.17
		556.256	94.5612			732.466	163.931			1481.34	421.817			2811.67	1572.71
		415.949	187.254			566.766	332.866			1065.26	629.917			2049.05	1634.76
		439.306	112.713			640.107	259.86			1037.11	352.196			2158.3	1387.81
		349.283	139.406			577.344	319.519			768.689	431.074			1673.43	1409
		412.379	119.82			679.413	220.654			1281.68	492.174			3034.88	1672.8
		161.595	158.825			444.545	453.253			546.827	576.754			1911.09	1907.95
		184.918	142.843			472.038	423.824			533.497	376.676			1701.41	1231.37
		356.156	211.645			520.487	378.378			1056.01	823.541			2233.56	2034.12
		150.684	243.877			344.211	553.653			548.704	1053.23			1769.32	2632.47
		288.488	167.501			479.279	419.52			888.978	611.836			1901.95	1998.78
		405.205	105.072			654.955	244.178			811.346	369.398			1645.44	1017.44
		440.741	78.3116			668.969	227.127			1266.11	376.559			2392.55	1449.65
		Paired t test				Paired t test				Paired t test				Paired t test
		P value	0.0011			P value	0.0053			P value	0.0057			P value	0.0172
		P value summary	**			P value summary	**			P value summary	**			P value summary	*
		Significantly different (P < 0.05)?	Yes			Significantly different (P < 0.05)?	Yes			Significantly different (P < 0.05)?	Yes			Significantly different (P < 0.05)?	Yes
		One- or two-tailed P value?	Two-tailed			One- or two-tailed P value?	Two-tailed			One- or two-tailed P value?	Two-tailed			One- or two-tailed P value?	Two-tailed
		t, df	t=4.269, df=12			t, df	t=3.402, df=12			t, df	t=3.358, df=12			t, df	t=2.761, df=12
		Number of pairs	13			Number of pairs	13			Number of pairs	13			Number of pairs	13
	H				I				J				K
	Time around the cup (s)	293.727	437.771		Time in the chamber (s)	367.534	532.265		Distance travelled around the cup (cm)	714.715	769.524		Distance travelled in the chamber (cm)	1206.77	1262.78
		426.693	294.528			516.283	382.683			1018.92	697.883			1766.98	1390.47
		519.686	172.739			634.768	264.164			1018.77	477.329			1738.78	1077.95
		591.992	120.387			714.648	185.052			693.991	268.142			1215.38	574.453
		350.083	308.475			536.803	363.03			428.146	414.254			661.829	683.562
		733.467	96.1628			776.944	121.421			700.852	200.834			957.462	431.187
		552.186	338.338			557.425	342.242			464.091	312.205			513.55	354.648
		630.831	147.014			724.858	174.708			1044.71	413.852			1431.09	685.043
		Paired t test				Paired t test				Paired t test				Paired t test
		P value	0.0208			P value	0.0147			P value	0.0097			P value	0.0117
		P value summary	*			P value summary	*			P value summary	**			P value summary	*
		Significantly different (P < 0.05)?	Yes			Significantly different (P < 0.05)?	Yes			Significantly different (P < 0.05)?	Yes			Significantly different (P < 0.05)?	Yes
		One- or two-tailed P value?	Two-tailed			One- or two-tailed P value?	Two-tailed			One- or two-tailed P value?	Two-tailed			One- or two-tailed P value?	Two-tailed
		t, df	t=2.970, df=7			t, df	t=3.218, df=7			t, df	t=3.522, df=7			t, df	t=3.383, df=7
		Number of pairs	8			Number of pairs	8			Number of pairs	8			Number of pairs	8

## Sheet: Supplementary Figure 2
	Supplementary Figure 2. Larval food odorants are not essential for the preference for fed larvae in non-fasting and fasting mice. Related to Figure 2.
	C	Control	Larval food odorants		D	Control	Larval food odorants		F	Control	Larval food odorants		G	Control	Larval food odorants
	Time around the cup (s)	160.46	150.417		Distance travelled around the cup (cm)	509.618	458.368		Time around the cup (s)	71.9386	158.525		Distance travelled around the cup (cm)	243.923	463.439
		206.44	218.018			526.892	491.598			165.432	440.607			353.012	937.805
		157.758	128.362			455.317	433.563			160.494	648.549			313.586	645.581
		67.334	105.973			255.627	474.159			370.771	142.943			567.658	342.102
		65.6657	116.116			245.633	497.851			260.694	320.02			517.625	637.353
		317.584	75.342			473.68	324.78			69.3026	238.939			231.807	748.138
		164.331	91.7251			556.916	366.141			367.768	230.697			505.366	521.097
		171.471	166.733			609.813	695.459			297.197	167.267			513.017	461.671
		Paired t test				Paired t test				Paired t test				Paired t test
		P value	0.3596			P value	0.818			P value	0.4156			P value	0.0982
		P value summary	ns			P value summary	ns			P value summary	ns			P value summary	ns
		Significantly different (P < 0.05)?	No			Significantly different (P < 0.05)?	No			Significantly different (P < 0.05)?	No			Significantly different (P < 0.05)?	No
		One- or two-tailed P value?	Two-tailed			One- or two-tailed P value?	Two-tailed			One- or two-tailed P value?	Two-tailed			One- or two-tailed P value?	Two-tailed
		t, df	t=0.9804, df=7			t, df	t=0.2390, df=7			t, df	t=0.8651, df=7			t, df	t=1.907, df=7
		Number of pairs	8			Number of pairs	8			Number of pairs	8			Number of pairs	8

## Sheet: Supplementary Figure 3
			Supplementary Figure 3. Larval excrements are not essential for the preference for fed larvae in non-fasting and fasting mice. Related to Figure 2.
	C	Excrement from fed larvae	Excrement from unfed larvae		D	Excrement from fed larvae	Excrement from unfed larvae		F	Excrement from fed larvae	Excrement from unfed larvae		G	Excrement from fed larvae	Excrement from unfed larvae
	Time around the cup (s)	167.434	260.827		Distance travelled around the cup (cm)	729.89	1212.85		Time around the cup (s)	131.999	174.875		Distance travelled around the cup (cm)	407.832	465.645
		306.773	240.774			1007.28	1001.29			172.806	155.856			606.549	455.869
		190.424	201.001			1029.03	872.139			194.761	183.851			446.509	350.564
		179.146	240.707			720.176	802.854			233.333	187.02			581.726	497.679
		305.606	218.585			1208.94	769.475			302.035	260.994			877.687	742.33
		164.298	161.395			506.717	691.384			261.461	214.047			563.738	546.251
		373.841	152.119			950.802	525.108			109.676	157.457			228.638	326.136
		148.749	373.607			636.505	897.196			167.334	415.182			452.181	779.992
		Paired t test				Paired t test				Wilcoxon matched-pairs signed rank test				Paired t test
		P value	0.974			P value	0.9857			P value	0.9453			P value	0.9993
		P value summary	ns			P value summary	ns			Exact or approximate P value?	Exact			P value summary	ns
		Significantly different (P < 0.05)?	No			Significantly different (P < 0.05)?	No			P value summary	ns			Significantly different (P < 0.05)?	No
		One- or two-tailed P value?	Two-tailed			One- or two-tailed P value?	Two-tailed			Significantly different (P < 0.05)?	No			One- or two-tailed P value?	Two-tailed
		t, df	t=0.03382, df=7			t, df	t=0.01852, df=7			One- or two-tailed P value?	Two-tailed			t, df	t=0.0008738, df=7
		Number of pairs	8			Number of pairs	8			Sum of positive, negative ranks	19.00 , -17.00			Number of pairs	8
										Sum of signed ranks (W)	2
										Number of pairs	8
										Number of ties (ignored)	0

[truncated: 8 more sheets: Supplementary Figure 5, Supplementary Figure 6, Supplementary Figure 7, Supplementary Figure 8, Supplementary Figure 9, Supplementary Figure 10, Supplementary Figure 11, Supplementary Figure 12]
